# Supplementary material for: TiO2–rGO nanocomposite as an efficient catalyst to photodegrade formalin in aquaculture's waters, under solar light
Source: Royal Society of Chemistry journal article supplement (doi:10.1039/c9ew00950g), 2020-01-01
Supplement: c9ew00950g1.pdf [file c9ew00950g1.pdf]

## Supporting information (SI)

### **TiO<sub>2</sub>-rGO nanocomposite as an efficient catalyst to photodegrade formalin in aquaculture's waters, under solar light**

Joana F. Leal <sup>a,b</sup>, Sandra M. A. Cruz <sup>c</sup>, Bernardo T. A. Almeida <sup>a</sup>, Valdemar I. Esteves<sup>a,b</sup>, Paula A. A. P. Marques <sup>c</sup>, Eduarda B.H. Santos<sup>a,b\*</sup>

<sup>a</sup> Department of Chemistry, University of Aveiro, 3810-193 Aveiro Portugal

<sup>b</sup> CESAM – Centre for Environmental and Marine Studies, University of Aveiro, 3810-193 Aveiro, Portugal

<sup>c</sup> TEMA and Department of Mechanical Engineering, University of Aveiro, 3810-193 Aveiro, Portugal

\*Corresponding author(s): [edsantos@ua.pt](mailto:edsantos@ua.pt)

#### Material and methods

##### **• Preparation of TiO<sub>2</sub>-rGO composites**

Briefly, 15.6 µL (0.25 % GO), 31.3 µL (0.5 % GO), 62.5 µL (1 % GO) and 187.5 µL (3 % GO) of the GO aqueous dispersion (4 mg/mL) were dispersed in a mixture of deionized water (10 mL) and ethanol 96 % (5 mL) and magnetically stirred for 30 minutes, at 500 rpm. Then, 25 mg of TiO<sub>2</sub> P25 were added and the suspension was magnetically stirred (also at 500 rpm), for 30 minutes. At last, 15 mL of this suspension was transferred into a 20-mL Teflon lined autoclave, sealed and kept at 120 °C during 3 h. The resultant nanocomposite was washed with deionized water and freeze-dried to avoid the particles agglomeration (Almeida et al., 2016). In parallel, a suspension containing only TiO<sub>2</sub> was subjected to the same treatment previously described for comparison.

## • Photodegradation experiments

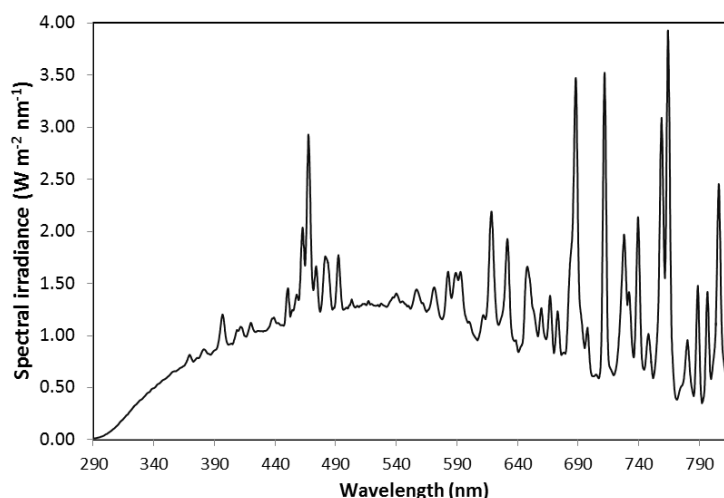

Figure S1 – Spectral irradiance of the 1500 W arc xenon lamp when using an outdoor UV filter, as given by the manufacturer (Solarbox 1500, Co.fo.me.gra, Italy). The spectrum is referred to a total irradiance of  $550 \text{ W m}^{-2}$  between 290-800 nm.

## • Formalin quantification using the Nash method

To quantify FM in the aqueous solutions, the following procedure was applied: 1 mL of irradiated and filtered FM solution (initial concentration of 40 mg/L) was mixed with 2 mL of Nash's reagent and adjusted to the final volume (10 mL) with ultrapure water. Then, samples were heated in a water bath at 50 °C (Jones et al., 1999), during 30 min. This reaction time was chosen because, after this time, the derivatization reaction attains the equilibrium and the solution absorbance reaches its maximum value (**figure S2**).

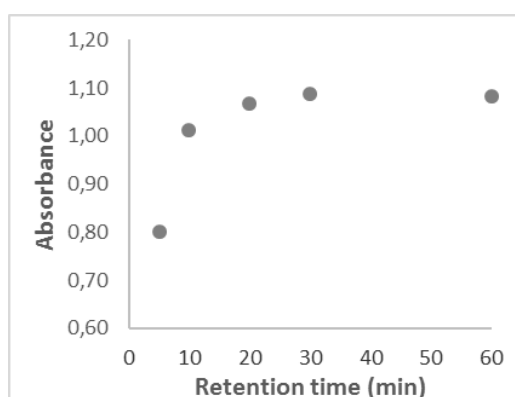

Figure S2 – Derivatization reaction of FM in function of reaction time.

During this process, a condensation reaction of ammonia and acetyl-acetone (2,4-pentanedione) in Nash's reagent with formaldehyde (FM) occurs, originating 3,5-

diacetyl-1,4-dihydrolutidine (DDL) (**Reaction S1**). DDL presents a yellow-green colour and its maximum absorbance occurs at 412 nm (Jones et al., 1999).

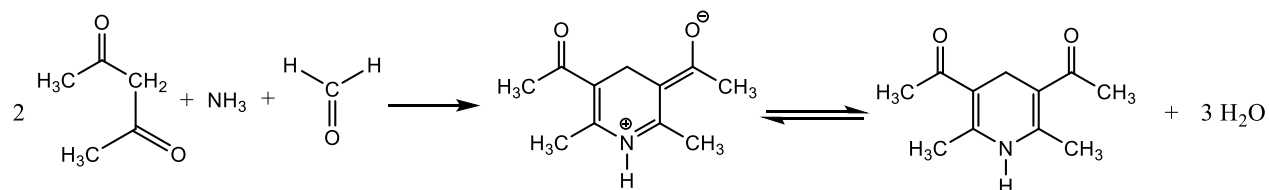

**Reaction S1 – Reaction between formaldehyde and the constituents of Nash’s reagent (ammonia and acetyl-acetone), originating 3,5-diacetyl-1,4-dihydrolutidine (DDL).**

To quantify FM, calibration curves were prepared in each day of analysis, using standard solutions of FM, which were subjected to the same derivatization reaction described above.

## Results and discussion

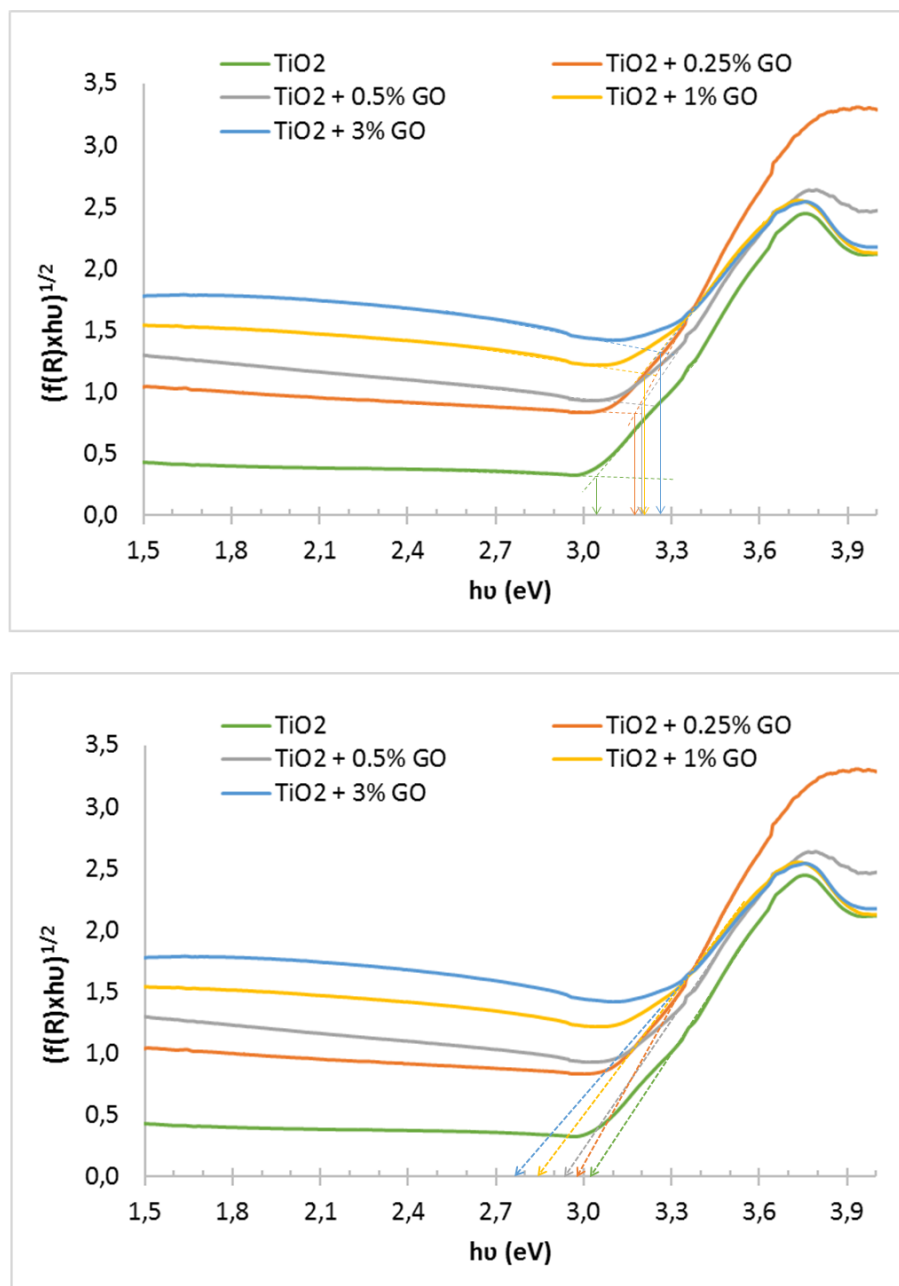

Figure S3 – Tauc plots  $(f(R) \cdot h\nu)^{1/2}$  versus  $h\nu$  (for indirect allowed transitions) with baseline correction (above) and without baseline correction (below).

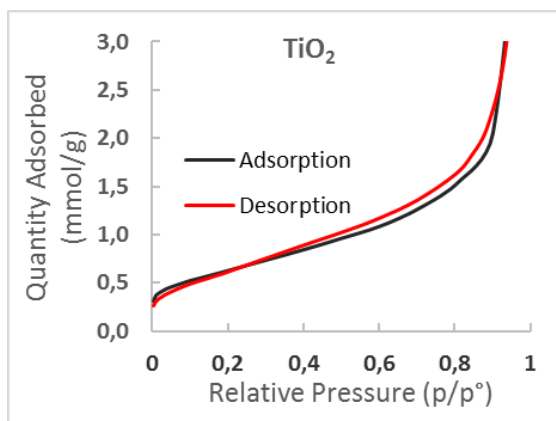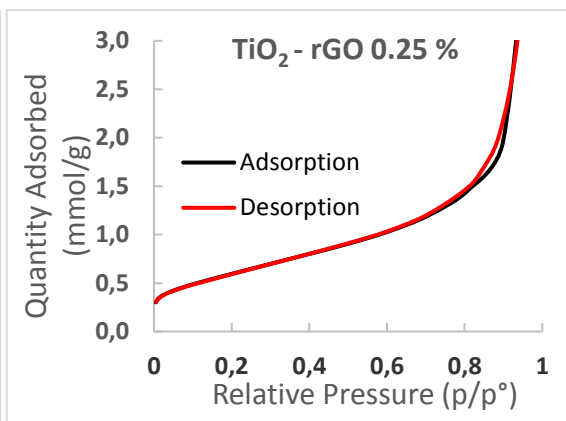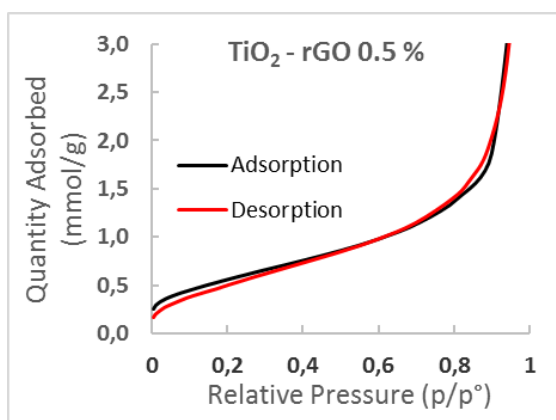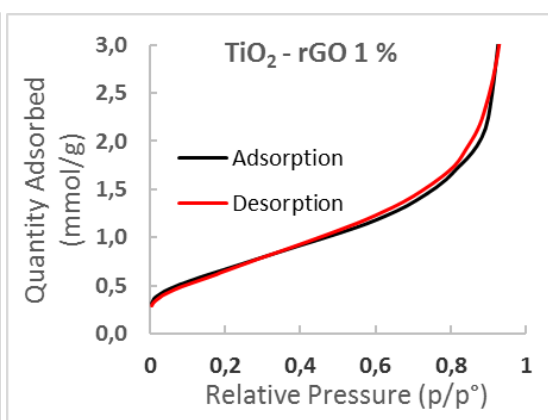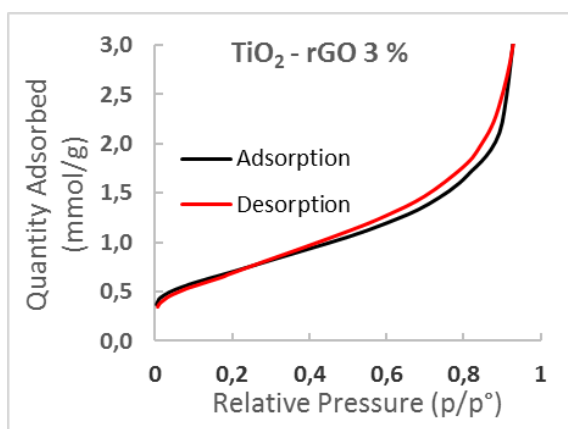

**Figure S4 – N<sub>2</sub> adsorption/desorption isotherms of pure TiO<sub>2</sub>, TiO<sub>2</sub>+GO 0.25%, TiO<sub>2</sub>+GO 0.5%, TiO<sub>2</sub>+GO 1% and TiO<sub>2</sub>+GO 3%.**

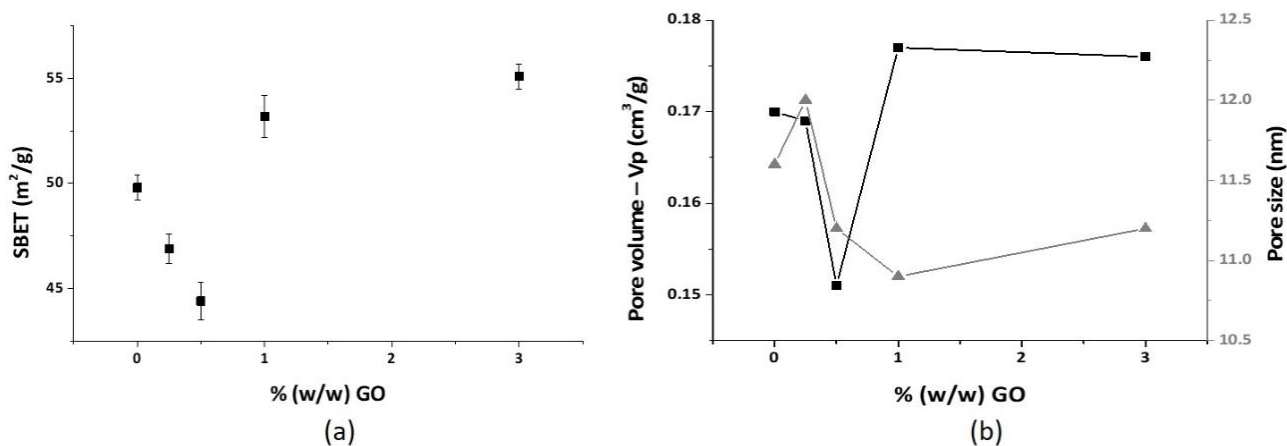

**Figure S5 – S<sub>BET</sub>, pore volume and pore size of nanocomposites of TiO<sub>2</sub>-GO with different content of GO.**

Almeida, N.A., Martins, P.M., Teixeira, S., Silva, J.A.L.d., Sencadas, V., Kühn, K., Cuniberti, G., Lanceros-Mendez, S., Marques, P.A.A.P., 2016. TiO<sub>2</sub>/graphene oxide immobilized in P(VDF-TrFE) electrospun membranes with enhanced visible-light-induced photocatalytic performance. J. Mater. Sci. 51, 6974-6986.

Jones, S.B., Terry, C.M., Lister, T.E., Johnson, D.C., 1999. Determination of Submicromolar Concentrations of Formaldehyde by Liquid Chromatography. Anal. Chem. 71, 4030-4033.
